# Supplementary material
Source: PubMed Central journal article supplement (PMC1995496)
Supplement: bmj_335_7621_624__1.pdf [file bmj_335_7621_624__1.pdf]

## Web references

- w1. Declaration of Helsinki (original version 1964).  
<http://www.pubmedcentral.nih.gov/picrender.fcgi?artid=1816102&blobtype=pdf>
- w2. Declaration of Helsinki (First revision 1975).  
<http://ethics.iit.edu/codes/coe/world.med.assoc.helsinki.1975.html>
- w3. Declaration of Helsinki (Second revision 1983).  
<http://www.cirp.org/library/ethics/helsinki/>
- w4. Declaration of Helsinki (Third revision 1989).  
<http://www.fda.gov/oc/health/helsinki89.html>
- w5. Declaration of Helsinki (Fourth revision 1996).  
[http://www.hku.hk/facmed/images/document/04research/institution/Declaration\\_of\\_Helsinki\\_1996\\_version.pdf](http://www.hku.hk/facmed/images/document/04research/institution/Declaration_of_Helsinki_1996_version.pdf)
- w6. Declaration of Helsinki (current version, Fifth revision 2000 with Notes)  
<http://www.wma.net/e/policy/b3.htm>
- w7. Side by side comparison of 1996 and 2000 texts  
<http://www.hhs.gov/ohrp/nhrpac/mtg12-00/h2000-1996.pdf>
- w8. Nuremburg Code (1947) <http://ohsr.od.nih.gov/guidelines/nuremberg.html>
- w9. Rothman D. Strangers at the bedside: a history of how law and bioethics transformed medical decision making. NY: Basic Books 1991. p. 62
- w10. Loff B, Black J. The declaration of Helsinki and research in vulnerable populations. *Medical Journal of Australia* 2000 March 20;172:292-295
- w11. CIOMS. International ethical guidelines for biomedical research involving human subjects. 2002. [http://www.cioms.ch/frame\\_guidelines\\_nov\\_2002.htm](http://www.cioms.ch/frame_guidelines_nov_2002.htm)
- w12. Nuffield Council on Bioethics: The ethics of research related to healthcare in developing countries. 2005.  
[http://www.nuffieldbioethics.org/fileLibrary/pdf/HRRDC\\_Follow-up\\_Discussion\\_Paper001.pdf](http://www.nuffieldbioethics.org/fileLibrary/pdf/HRRDC_Follow-up_Discussion_Paper001.pdf)
- w13. UNESCO: Universal declaration on bioethics and human rights. 2005.  
<http://unesdoc.unesco.org/images/0014/001461/146180E.pdf>
- w14. Sherwin S, Baylis F. The feminist health care ethics consultant as architect and advocate. *Public Affairs Quarterly* 2003 17(2):141-158
- w15. Paul C. Internal and external morality of medicine: lessons from New Zealand. *BMJ* 2000 Feb 19;320(7233):499-503.
